# Supplementary material for: Microstructure, Physical and Biological Properties, and BSA Binding Investigation of Electrospun Nanofibers Made of Poly(AA-co-ACMO) Copolymer and Polyurethane
Source: MDPI journal article supplement (doi:10.3390/molecules28093951), 2023-05-08
Supplement: s1 [file s1]

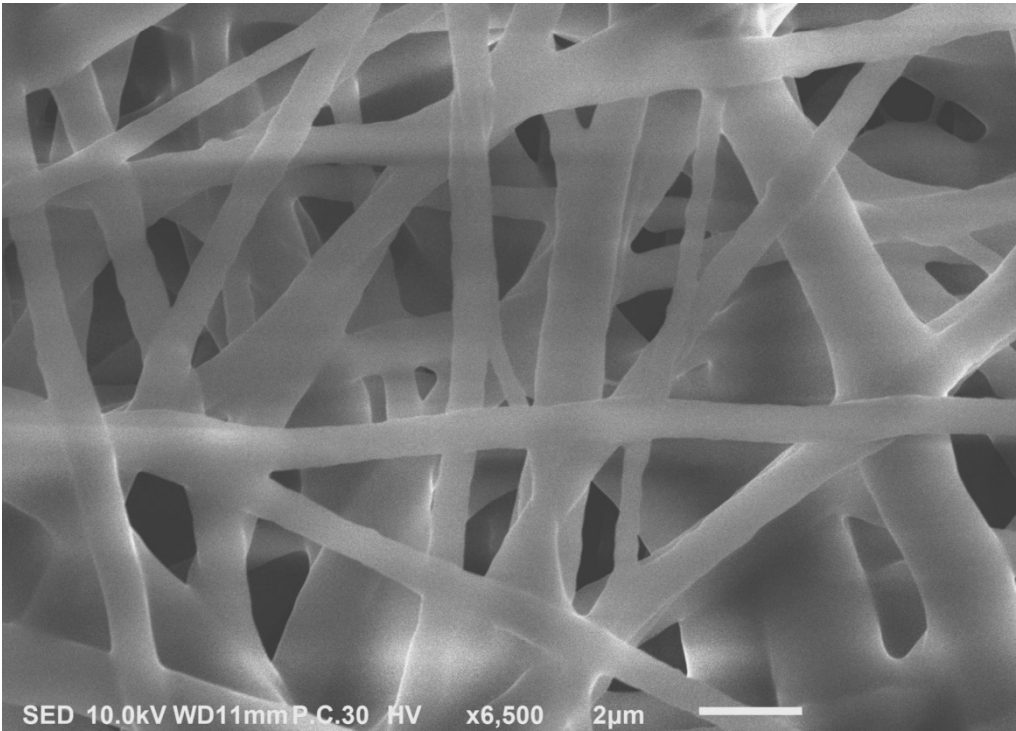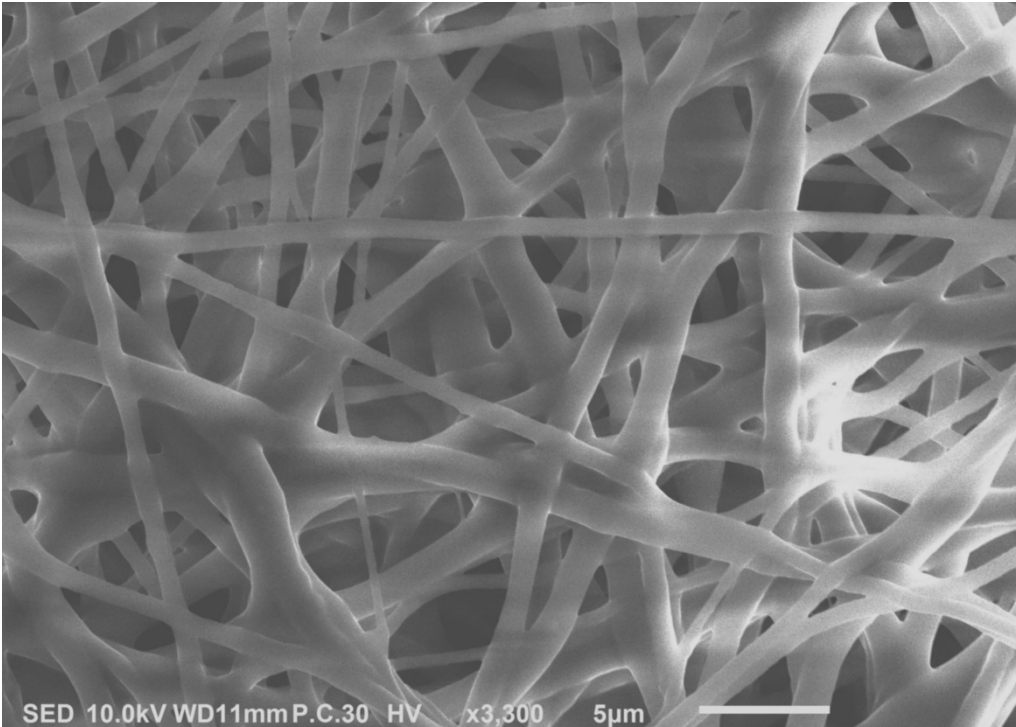

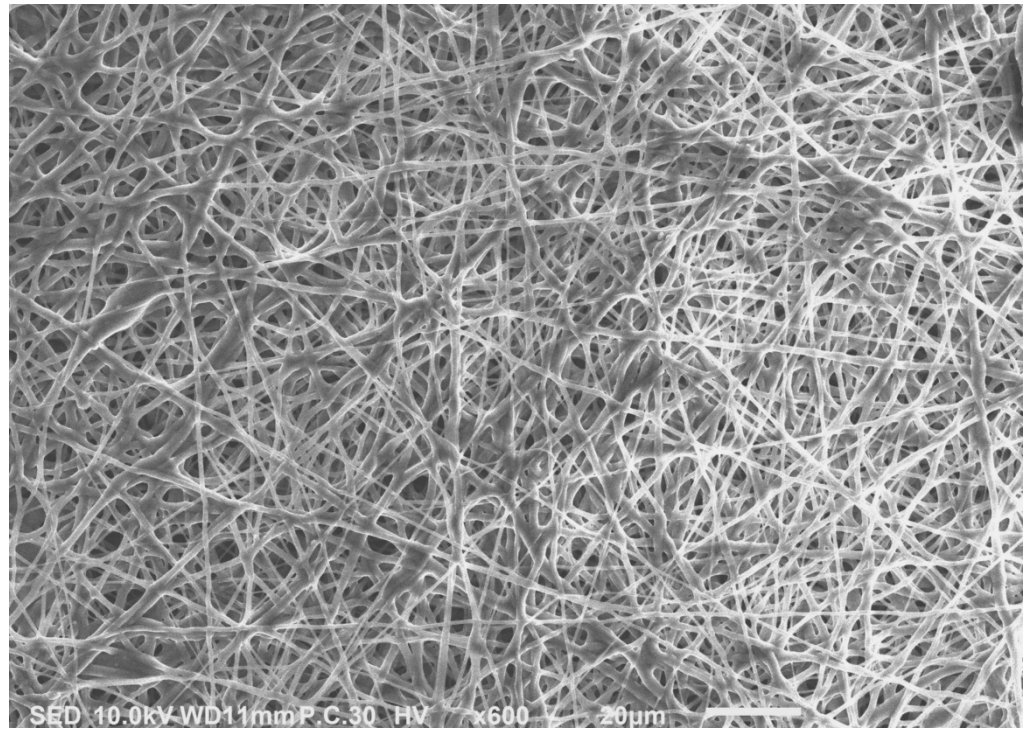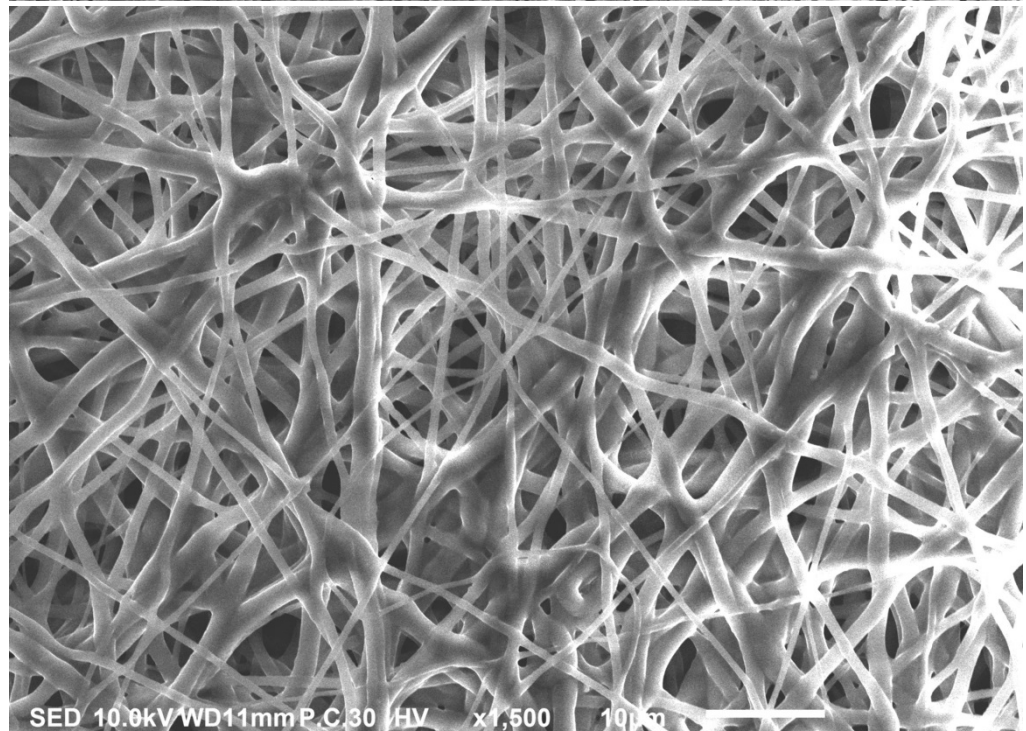

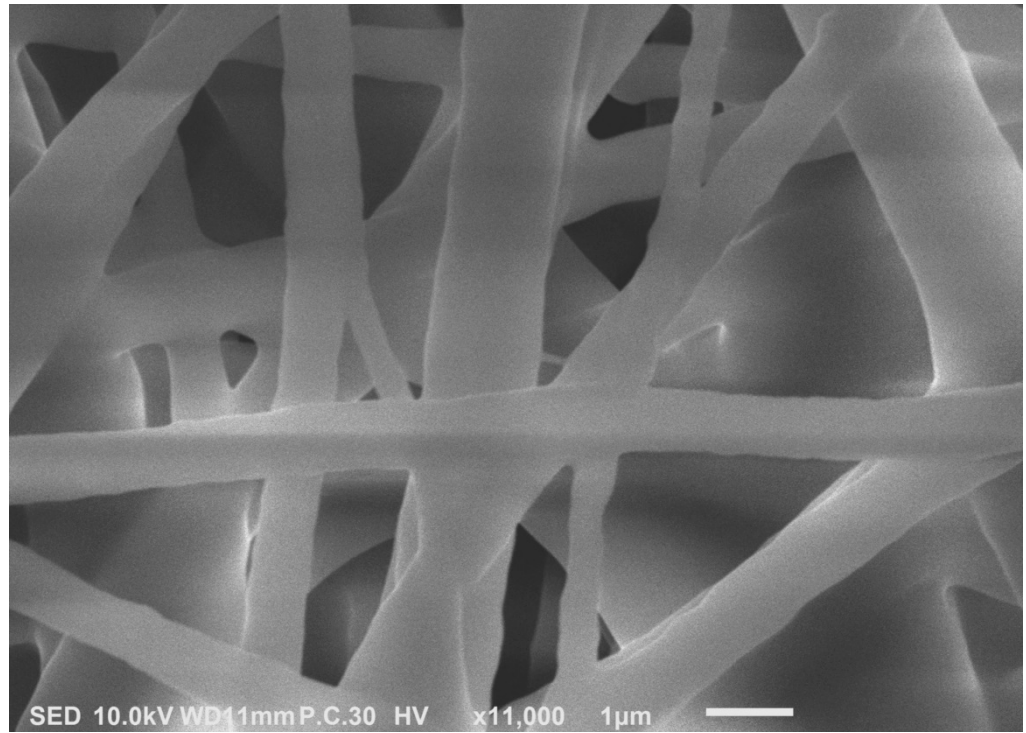

**Figure S1.** SEM images of the electrospun nanofibers **PU**.

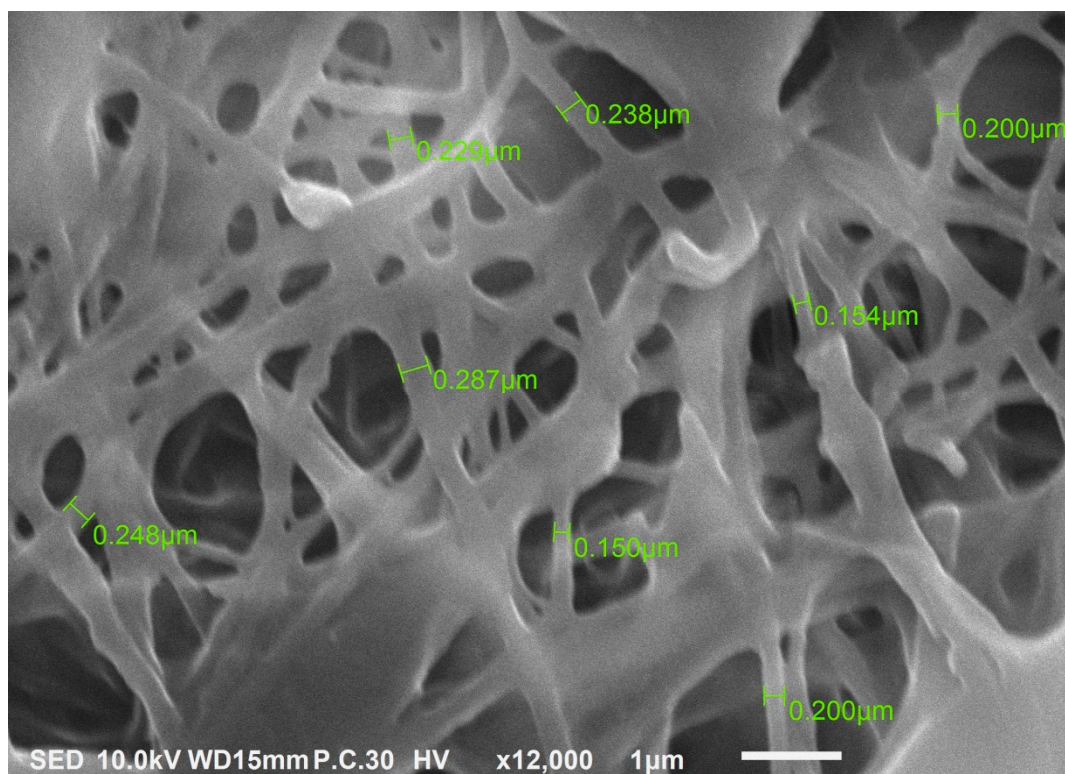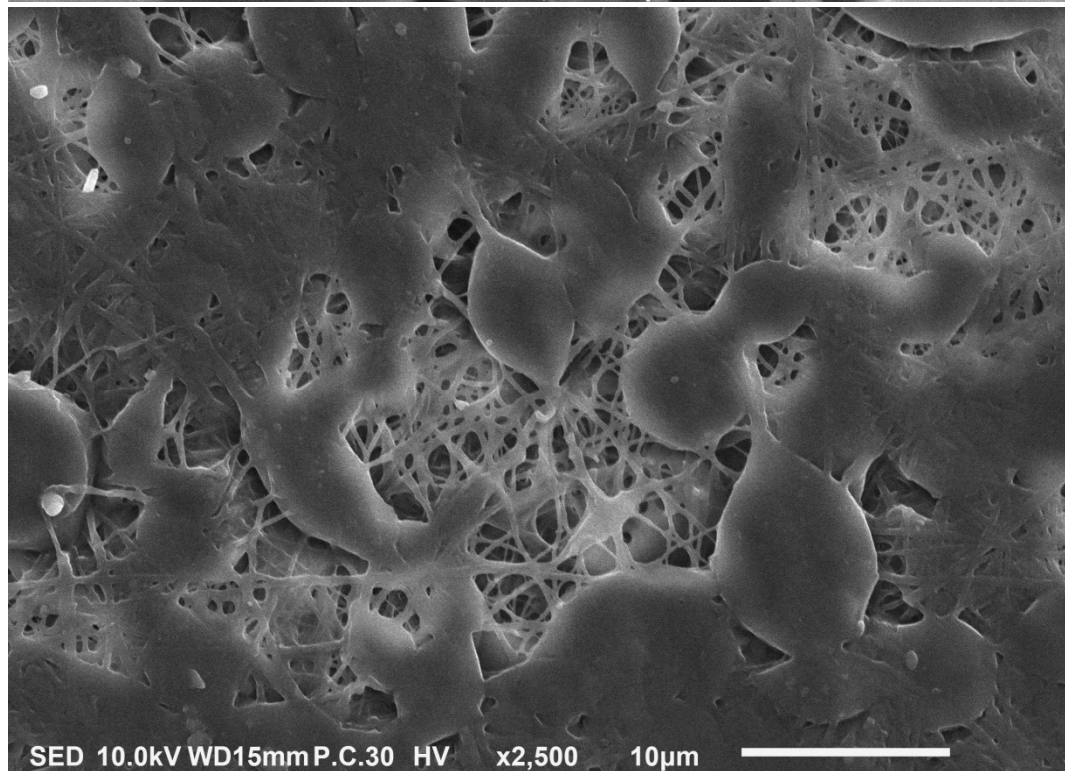



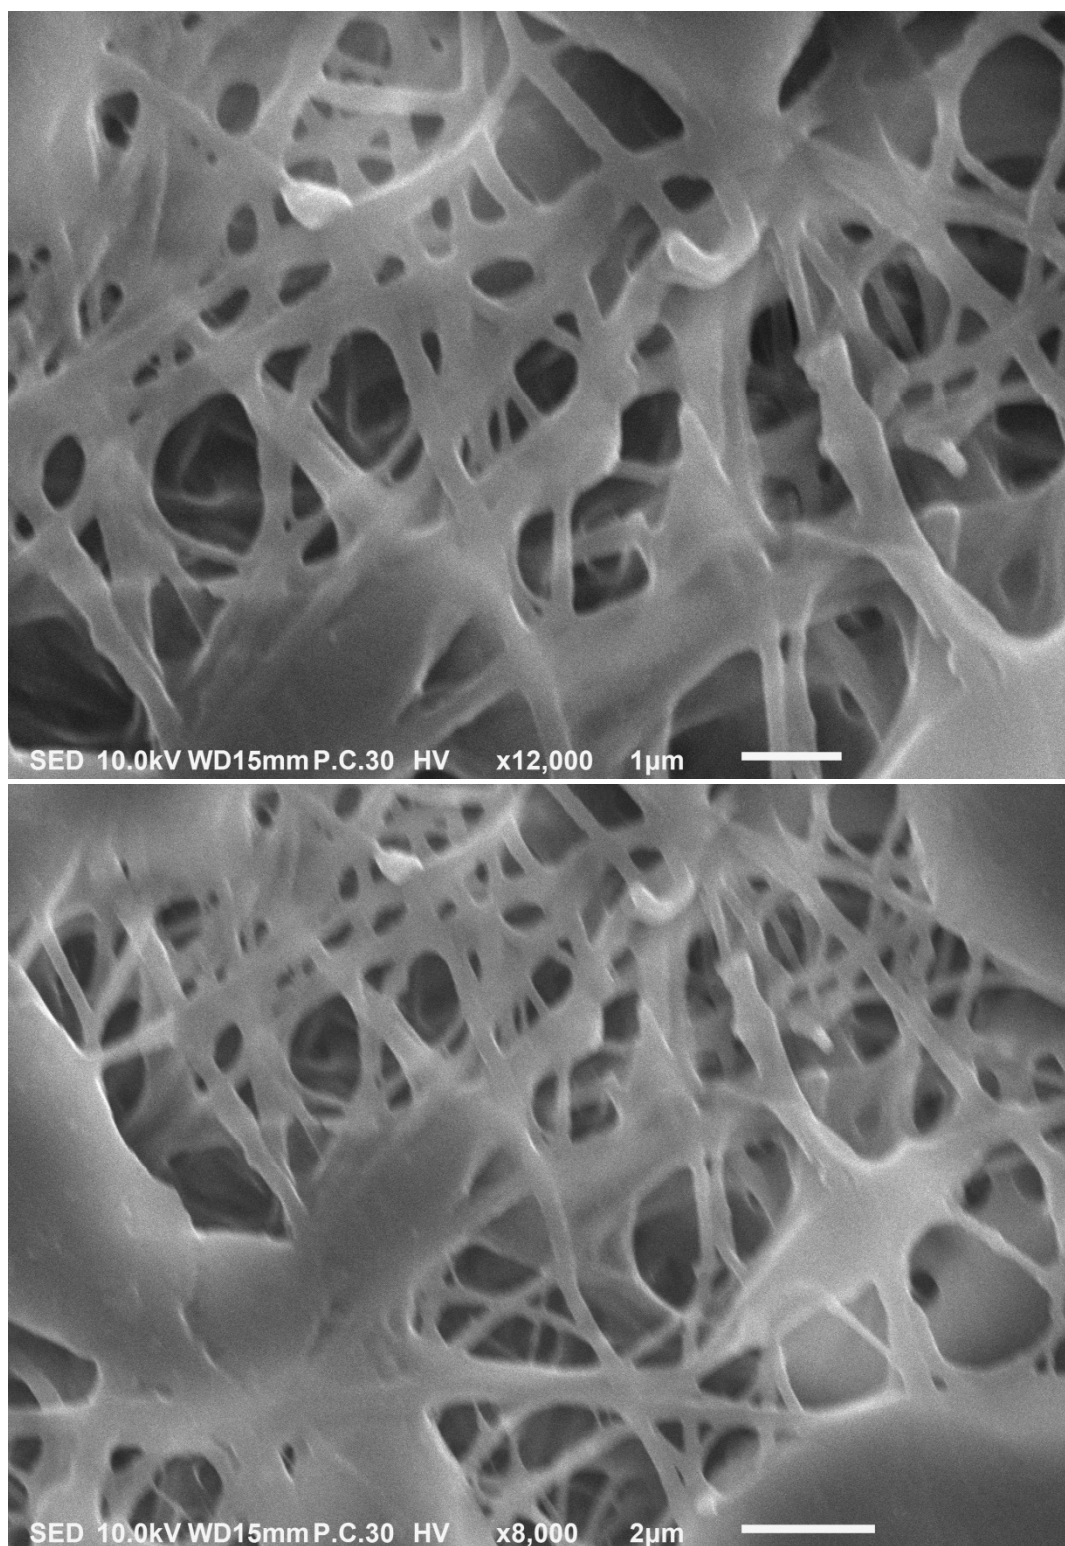

**Figure S2.** SEM images of the electrospun nanofibers **NF11**

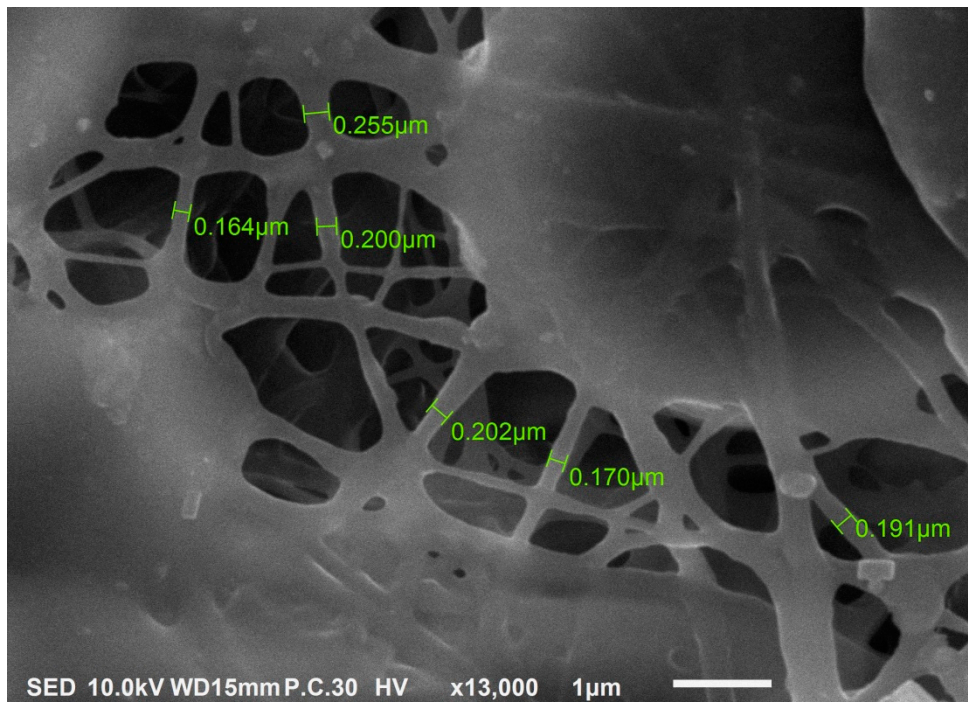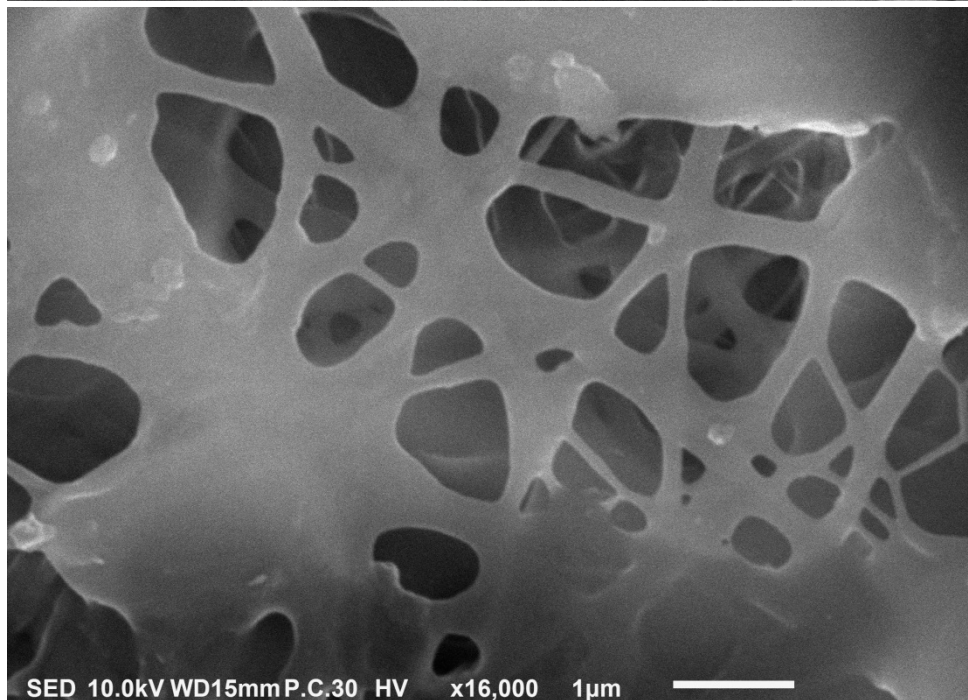

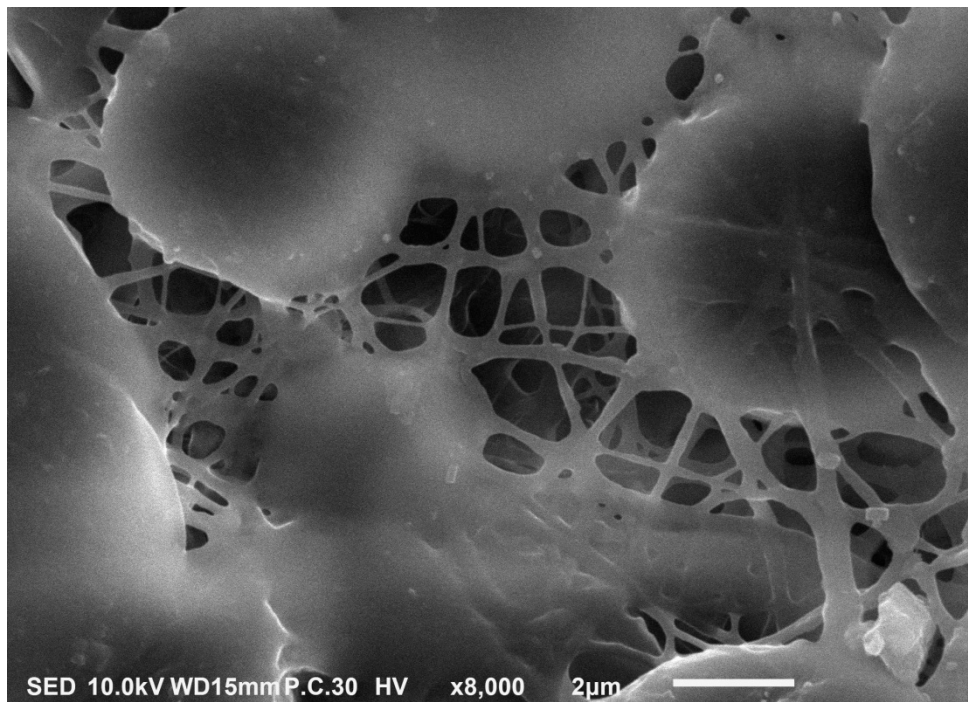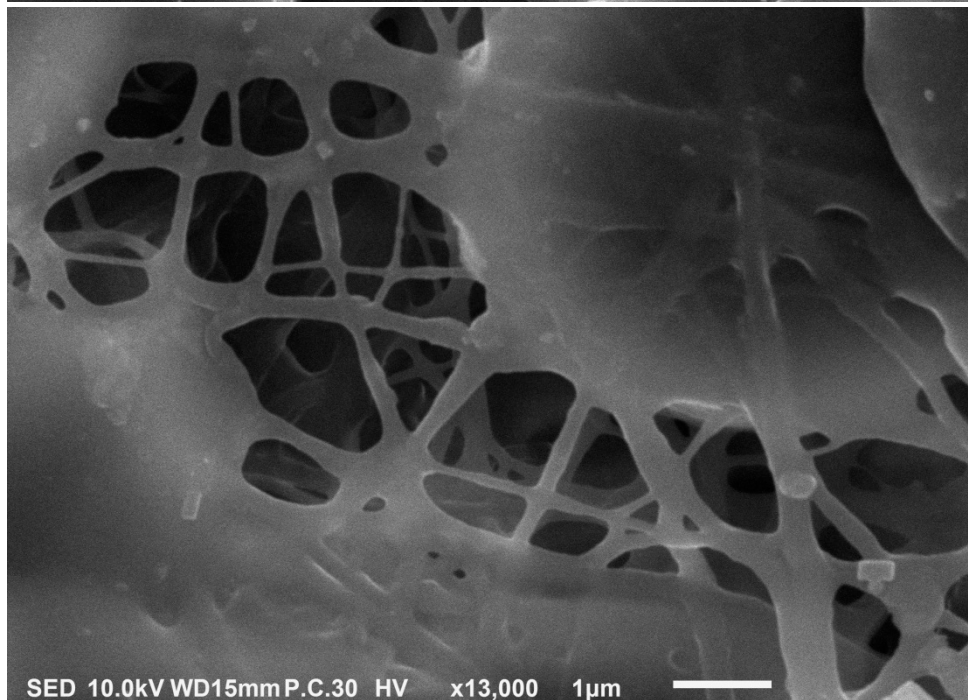

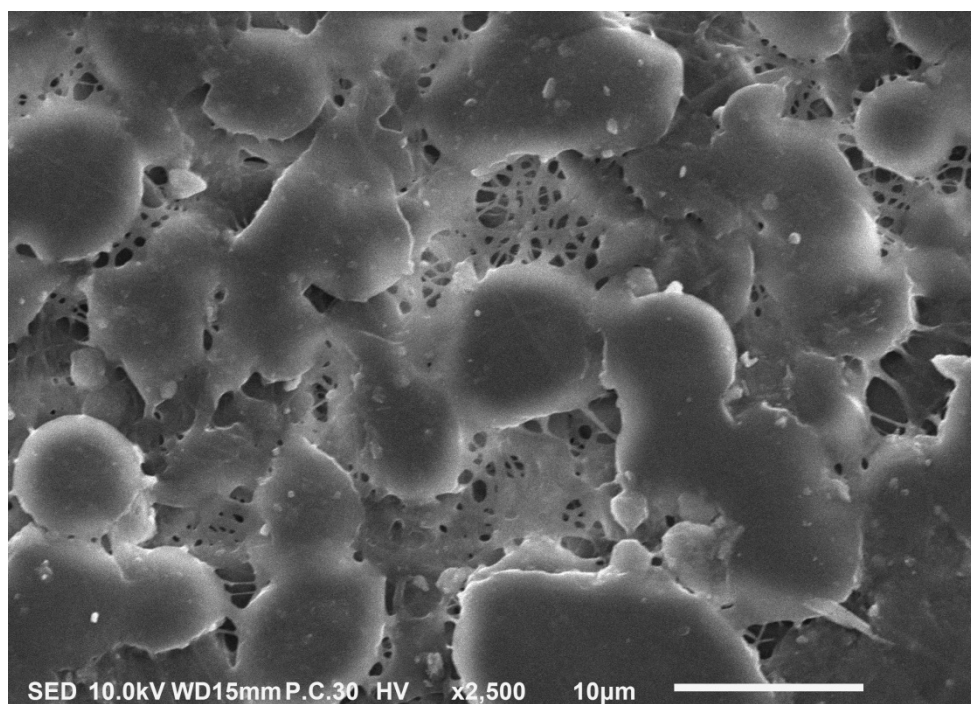

**Figure S3.** SEM images of the electrospun nanofibers **NF21**



**Table S1.** Tensile results of **PU**, **NF11** and **NF21** nanofibers.

| Gauge Length (mm) | Width (mm) | Breadth (mm) | Area (mm <sup>2</sup> ) | Sample | Speed (mm/min) | Tensile Strength (MPa) | Young's Modulus (MPa) | Stain at Break (MPa) |
|-------------------|------------|--------------|-------------------------|--------|----------------|------------------------|-----------------------|----------------------|
| 20                | 10         | 0.025        | 0.25                    | NF11   | 2              | 14.97228613            | 39.02446197           | 9.153561181          |
| 20                | 10         | 0.03         | 0.3                     | NF11   | 2              | 14.28482108            | 38.09222654           | 9.285563161          |
| 20                | 10         | 0.035        | 0.35                    | NF11   | 2              | 18.25692774            | 60.83796882           | 9.102875727          |
| 20                | 10         | 0.165        | 1.65                    | PU     | 2              | 5.066446186            | 7.099307274           | 3.770019781          |
| 20                | 10         | 0.23         | 2.3                     | PU     | 2              | 4.905684152            | 9.664012301           | 2.634560679          |
| 20                | 10         | 0.25         | 2.5                     | PU     | 2              | 5.587143122            | 9.022896514           | 3.856163025          |
| 20                | 10         | 0.06         | 0.6                     | NF21   | 2              | 9.785045673            | 15.63562336           | 8.244864605          |
| 20                | 10         | 0.06         | 0.6                     | NF21   | 2              | 7.523199246            | 24.15903296           | 5.77640464           |
| 20                | 10         | 0.06         | 0.6                     | NF21   | 2              | 8.211512053            | 20.06515593           | 5.953748933          |
